# Supplementary material
Source: Springer Nature journal article supplement (https://www.springermedizin.de/resource/supplementary/12955_2009_656_MOESM5_ESM.pdf/9561016)

# SDS-scores of SF-36 composite scores evaluating first stroke patients with VFD compared to stroke patients with different lesion ages

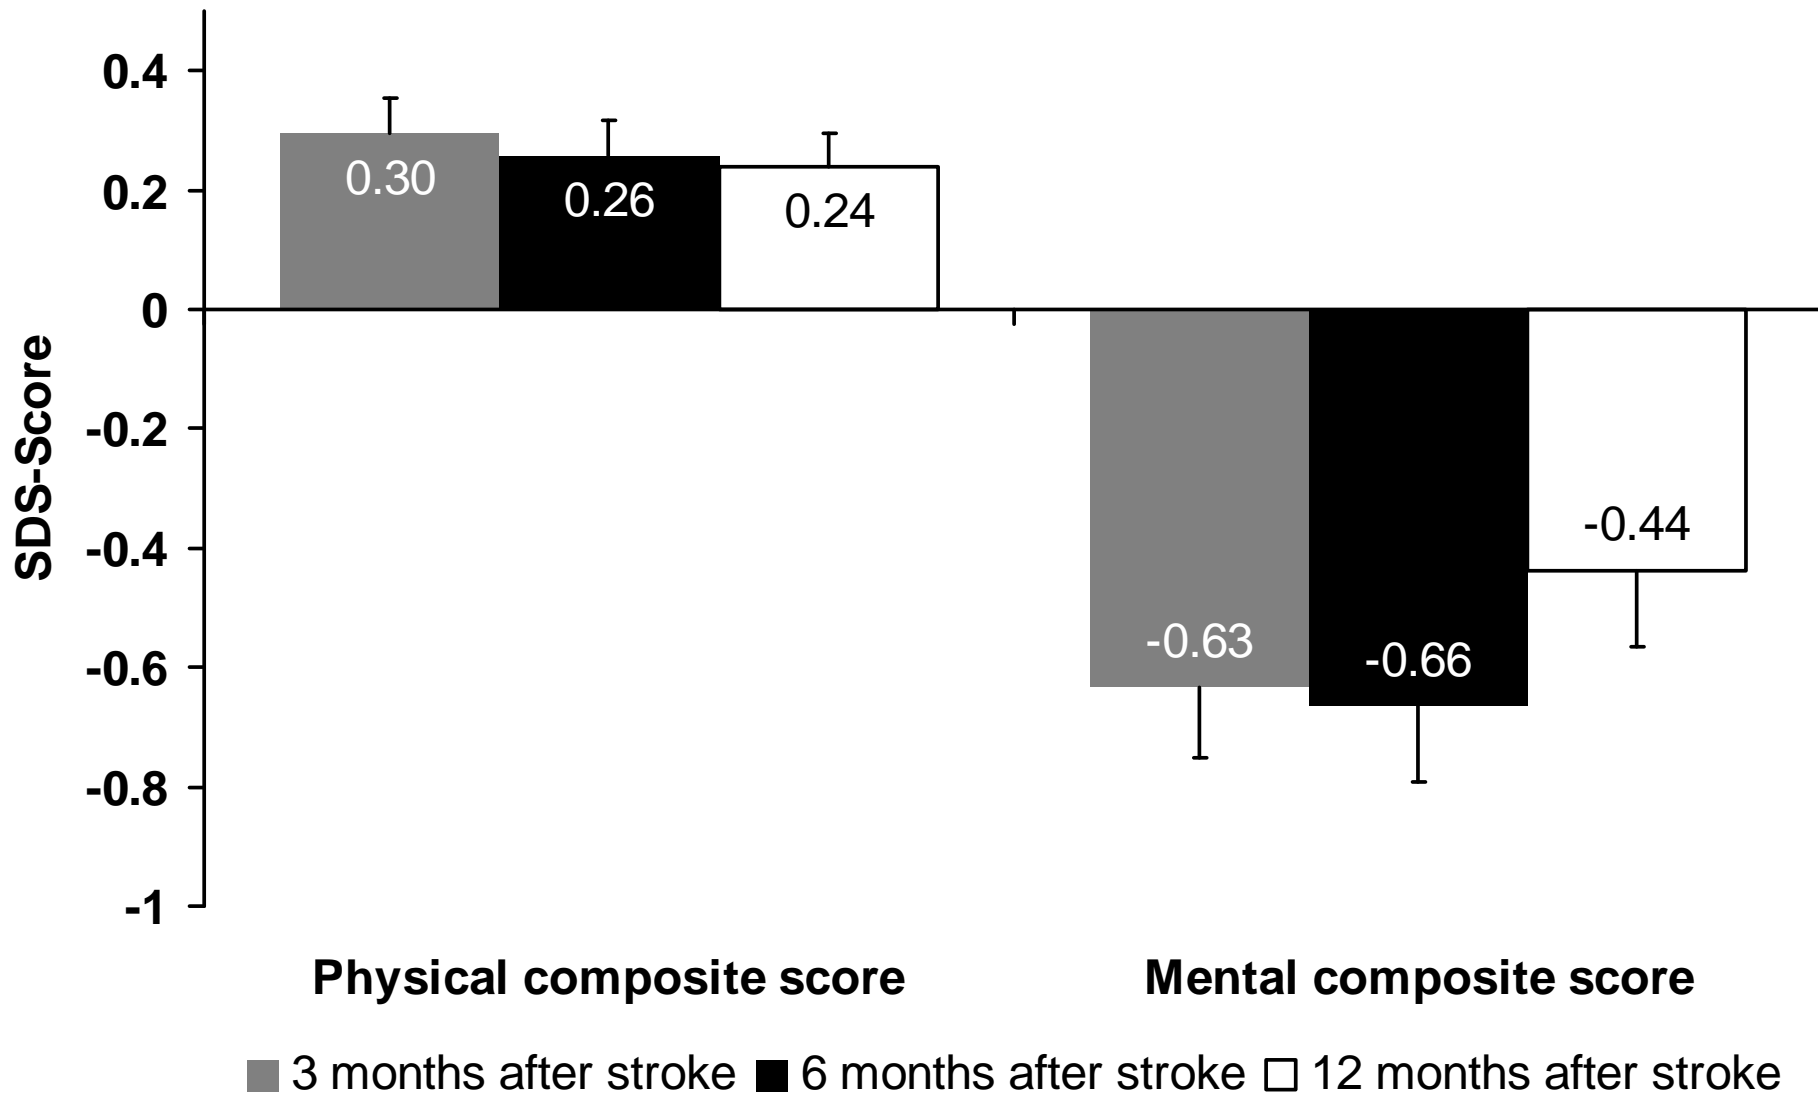

Supplement: MOESM5 [file 9561016]
